# Supplementary material for: Differences in fruit and vegetable intake and their determinants among 11-year-old schoolchildren between 2003 and 2009
Source: Springer Nature journal article supplement (doi:10.1186/1479-5868-8-141), 2011-12-01
Supplement: 12966_2011_532_MOESM1_ESM.pdf [file 12966_2011_532_MOESM1_ESM.pdf]

2003

**PRO CHILDREN**

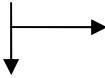

**12 Sick, no**

**n 1113**

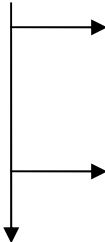

**2 not reliable**

**5 gender was missing**

**1105**

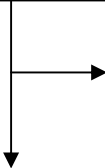

**5 overreporting (> 1000)**

**1100 students**  
included in SPSS file

2009

**PRO GREENS**

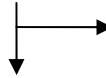

**186 Sick, no**

**n 580**

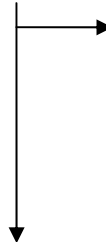

**3 not reliable**

**n 577**

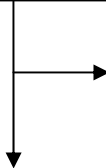

**5 overreporting (> 1000)**

**572 students**  
included in SPSS file
